# Supplementary material
Source: Springer Nature journal article supplement (https://www.springermedizin.de/resource/supplementary/12936_2008_686_MOESM3_ESM.pdf/9548002)

PFE1590w

Gal4DBD  
PFE1350c  
(aa 9-135)  
(aa 94-156)  
(aa 48-173)  
(aa 69-148)

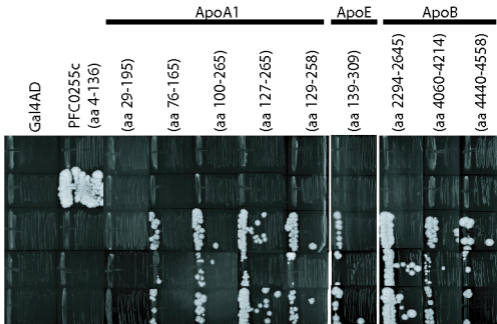

Supplement: MOESM3 [file 9548002]
